# Supplementary material for: Electrochemical stability of biodegradable Zn–Cu alloys through machine-learning accelerated high-throughput discovery
Source: Royal Society of Chemistry journal article supplement (doi:10.1039/d4cp02307b), 2024-01-01
Supplement: d4cp02307b1.pdf [file d4cp02307b1.pdf]

Supporting Information for ‘Electrochemical Stability of  
biodegradable Zn-Cu alloys through machine-learning  
accelerated high-throughput discovery’

Kun Luo,<sup>ab</sup> Zhaorui Liu,<sup>ab</sup> Rui Yu,<sup>ab</sup> Tengfei Xu,<sup>ab</sup> Dominik Legut,<sup>cd</sup> Xing Yin <sup>\*e</sup> and

Ruifeng Zhang<sup>\*ab</sup>

*<sup>a</sup>School of Materials Science and Engineering, Beihang University, Beijing 100191, P. R. China*

*<sup>b</sup>Center for Integrated Computational Engineering (International Research Institute for  
Multidisciplinary Science) and Key Laboratory of High-Temperature Structural Materials &  
Coatings Technology (Ministry of Industry and Information Technology), Beihang University,  
Beijing 100191, P. R. China*

*<sup>c</sup>IT4Innovations, VSB-Technical University of Ostrava, 17. listopadu 2172/15, CZ-70800 Ostrava,  
Czech Republic*

*<sup>d</sup>Department of Condensed Matter Physics, Faculty of Mathematics and Physics, Charles  
University, Ke Karlovu 3, 121 16 Prague 2, Czech Republic*

*<sup>e</sup>National Key Laboratory of Nuclear Reactor Technology, Nuclear Power Institute of China,  
Chengdu 610041, China*

*\*Corresponding author. Tel: 86-10-8231-5007 E-mail: [zrf@buaa.edu.cn](mailto:zrf@buaa.edu.cn) (Ruifeng Zhang) and  
[yinxingwt@163.com](mailto:yinxingwt@163.com) (Xing Yin)*

**Table S1.** Calculated lattice constants, formation energies, and volume per atom of partial results of the high-throughput of Zn-Cu alloys from the Inorganic Crystal Structure Database (ICSD) prototype library[1].

|                                 | Lattice constants/ Å |       |        | Atom number | Formation energy/(eV/atom) | Volume per atom/Å <sup>3</sup> | Space group                |
|---------------------------------|----------------------|-------|--------|-------------|----------------------------|--------------------------------|----------------------------|
|                                 | a                    | b     | c      |             |                            |                                |                            |
| Cu <sub>3</sub> Zn              | 3.685                | 3.685 | 14.727 | 16          | -0.0693                    | 12.497                         | I4/mmm(#139)               |
|                                 | 5.218                | 5.218 | 12.759 | 24          | -0.0678                    | 12.534                         | P6 <sub>3</sub> /mmc(#194) |
|                                 | 5.204                | 5.204 | 21.293 | 40          | -0.0677                    | 12.487                         | P6 <sub>3</sub> /mmc(#194) |
|                                 | 5.180                | 5.187 | 14.892 | 32          | -0.0677                    | 12.505                         | Cmca(#64)                  |
|                                 | 3.699                | 3.699 | 25.587 | 28          | -0.0676                    | 12.506                         | P4/mmm(#123)               |
|                                 | 7.388                | 7.361 | 7.373  | 32          | -0.0674                    | 12.530                         | Fm $\bar{3}$ m(#69)        |
|                                 | 3.685                | 3.685 | 3.685  | 4           | -0.0673                    | 12.512                         | Pm $\bar{3}$ m(#221)       |
|                                 | 5.211                | 5.211 | 5.211  | 8           | -0.0670                    | 12.514                         | P6 <sub>3</sub> /mmc(#194) |
|                                 | 5.210                | 5.210 | 4.251  | 8           | -0.0670                    | 12.491                         | P6 <sub>3</sub> /m(#176)   |
|                                 | 3.623                | 7.566 | 8.536  | 16          | -0.0664                    | 13.234                         | P2 <sub>1</sub> /c(#14)    |
| CuZn                            | 5.931                | 5.931 | 5.931  | 16          | -0.0910                    | 13.038                         | Pm $\bar{3}$ m(#221)       |
|                                 | 5.933                | 5.933 | 5.933  | 16          | -0.0909                    | 13.055                         | I2 <sub>1</sub> 3(#199)    |
|                                 | 5.903                | 6.052 | 2.928  | 8           | -0.0906                    | 13.076                         | Cmmm(#65)                  |
|                                 | 5.935                | 5.935 | 5.935  | 16          | -0.0905                    | 13.064                         | I2 <sub>1</sub> 3(#199)    |
|                                 | 5.479                | 8.600 | 4.440  | 16          | -0.0903                    | 13.075                         | Cm(#8)                     |
|                                 | 4.136                | 4.136 | 3.052  | 4           | -0.0897                    | 13.052                         | P4/nmm(#129)               |
|                                 | 4.222                | 5.149 | 5.146  | 8           | -0.0896                    | 13.076                         | C2/m(#12)                  |
|                                 | 5.934                | 5.934 | 5.939  | 16          | -0.0896                    | 13.069                         | I4/mcm(#140)               |
|                                 | 5.578                | 8.751 | 4.285  | 16          | -0.0894                    | 13.071                         | Cmca(#64)                  |
|                                 | 3.868                | 3.868 | 3.498  | 4           | -0.0893                    | 13.085                         | P4/nmm(#129)               |
| Cu <sub>5</sub> Zn <sub>8</sub> | 8.883                | 8.883 | 8.883  | 52          | -0.1033                    | 13.482                         | I $\bar{4}$ 3m(#217)       |
|                                 | 17.101               | 2.620 | 11.727 | 26          | 0.0105                     | 15.123                         | C2/m(#12)                  |
|                                 | 5.364                | 5.364 | 22.309 | 39          | 0.0779                     | 14.256                         | R $\bar{3}$ m(#166)        |
| CuZn <sub>3</sub>               | 5.476                | 5.476 | 4.269  | 8           | -0.0713                    | 13.856                         | P6 <sub>3</sub> /mmc(#194) |
|                                 | 5.448                | 5.448 | 19.414 | 36          | -0.0695                    | 13.863                         | R $\bar{3}$ m(#166)        |
|                                 | 4.749                | 5.443 | 8.552  | 16          | -0.0690                    | 13.818                         | P2 <sub>1</sub> /c(#14)    |
|                                 | 5.447                | 4.274 | 4.736  | 8           | -0.0684                    | 13.832                         | Pmmn(#59)                  |
|                                 | 4.321                | 5.394 | 9.489  | 16          | -0.0673                    | 13.822                         | Pnma(#62)                  |
|                                 | 6.959                | 4.740 | 6.910  | 16          | -0.0661                    | 13.873                         | P2 <sub>1</sub> /c(#14)    |
|                                 | 6.906                | 4.741 | 6.956  | 16          | -0.0660                    | 13.857                         | P2 <sub>1</sub> /c(#14)    |
|                                 | 4.250                | 2.777 | 4.706  | 4           | -0.0587                    | 13.885                         | Pmm2(#25)                  |
|                                 | 5.457                | 5.457 | 21.459 | 40          | -0.0549                    | 13.835                         | P6 <sub>3</sub> /mmc(#194) |

|                   |        |        |        |    |         |        |                                                     |
|-------------------|--------|--------|--------|----|---------|--------|-----------------------------------------------------|
|                   | 7.207  | 7.207  | 7.630  | 24 | -0.0472 | 14.3   | $P\bar{3}c1$ (#165)                                 |
| CuZn <sub>4</sub> | 4.782  | 4.285  | 13.679 | 20 | -0.0564 | 14.016 | Pnma(#62)                                           |
|                   | 11.826 | 4.773  | 5.127  | 20 | -0.0509 | 14.056 | C2/c(#15)                                           |
|                   | 4.310  | 5.835  | 11.624 | 20 | -0.0438 | 14.62  | P2 <sub>1</sub> 2 <sub>1</sub> 2 <sub>1</sub> (#19) |
|                   | 5.191  | 16.643 | 5.068  | 30 | -0.0348 | 14.324 | Cm(#8)                                              |
|                   | 7.199  | 5.403  | 5.581  | 10 | -0.0208 | 14.764 | C2/m(#12)                                           |
|                   | 4.389  | 12.379 | 11.552 | 40 | -0.0199 | 15.333 | Pbca(#61)                                           |
|                   | 6.080  | 6.080  | 3.804  | 10 | -0.0173 | 14.063 | I4/m(#87)                                           |
|                   | 9.893  | 4.058  | 8.049  | 20 | -0.0079 | 14.874 | P2 <sub>1</sub> /c(#14)                             |
|                   | 4.148  | 13.178 | 5.237  | 20 | 0.0049  | 14.316 | Cmcm(#63)                                           |
|                   | 6.463  | 6.463  | 6.768  | 20 | 0.0096  | 14.134 | P4 <sub>1</sub> 2 <sub>1</sub> 2(#92)               |
| CuZn <sub>5</sub> | 4.784  | 4.784  | 8.581  | 12 | -0.0390 | 14.174 | P6 <sub>3</sub> 22(#182)                            |
|                   | 12.600 | 80832  | 6.606  | 48 | -0.0361 | 14.732 | P2 <sub>1</sub> /c(#14)                             |
|                   | 2.879  | 9.894  | 12.399 | 24 | -0.0150 | 14.715 | Cmcm(#63)                                           |
|                   | 5.108  | 8.450  | 8.368  | 24 | -0.0094 | 14.460 | C2/m(#12)                                           |
|                   | 12.060 | 4.292  | 7.290  | 24 | -0.0090 | 15.127 | C2/m(#12)                                           |
|                   | 6.773  | 10.661 | 11.133 | 48 | -0.0079 | 15.151 | P2 <sub>1</sub> /c(#14)                             |
|                   | 6.150  | 6.150  | 9.795  | 24 | -0.0002 | 15.435 | I4/mcm(#140)                                        |
|                   | 6.821  | 15.182 | 6.801  | 48 | 0.0236  | 14.674 | Pnma(#62)                                           |
|                   | 7.661  | 9.539  | 4.896  | 24 | 0.0303  | 14.908 | Cmcm(#63)                                           |
|                   | 12.787 | 12.787 | 4.589  | 48 | 0.0397  | 15.631 | $\bar{I}42d$ (#122)                                 |

**Table S2.** The setup of hyper-parameters used in sklearn for XGBoost. The explanation of each hyper-parameter can be found in Ref [2].

| Parameter                | Value             |
|--------------------------|-------------------|
| num_round (n_estimators) | 300               |
| seed                     | 0                 |
| eta (learning_rate)      | 0.1               |
| colsample_bytree         | 0.7               |
| subsample                | 0.90              |
| max_depth                | 5                 |
| min_child_weight         | 1                 |
| lambda                   | 1                 |
| gamma                    | 0.05              |
| objective                | reg: squarederror |
| verbosity                | 1                 |

**Fig. S1** Comparison of DFT-calculated formation energy and predicted formation energy with models created using the (a) SOAP, (b) MBTR, (c) Ewald, (d) Sine matrix, (e) ACSF. (f) Average performance of models constructed using five descriptors after five-fold cross-validation.

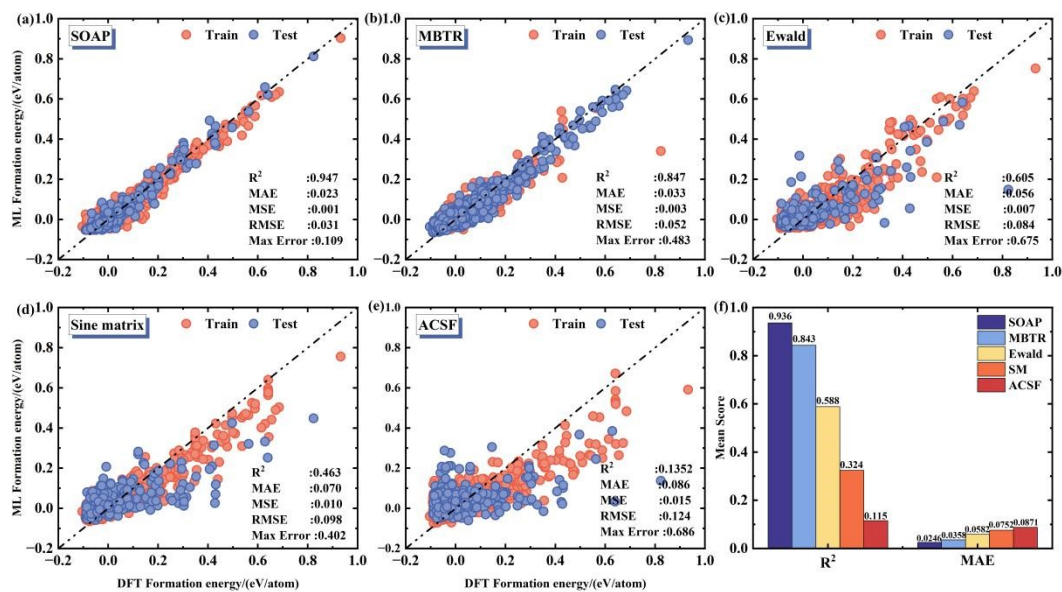

**Fig. S2** Phonon dispersion curves result for (a)  $\text{Cu}_3\text{Zn}$ , (b)  $\text{CuZn}_3$ .

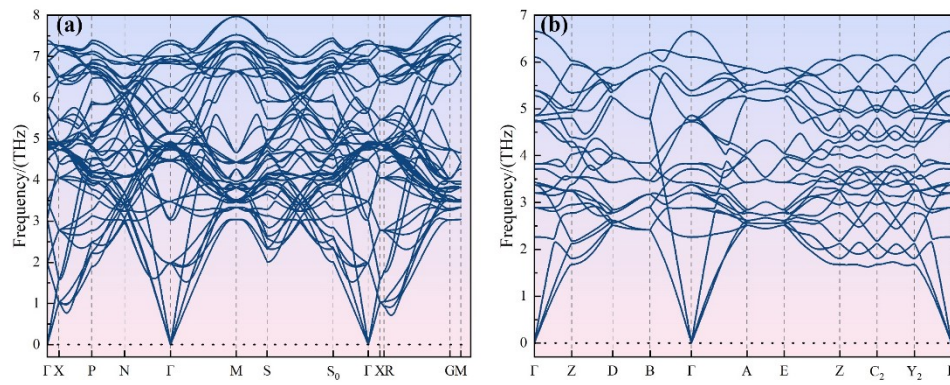

**Fig. S3** AIMD simulation curves result and the structural changes for (a)  $\text{Cu}_3\text{Zn}$ , (b)  $\text{CuZn}_3$ .

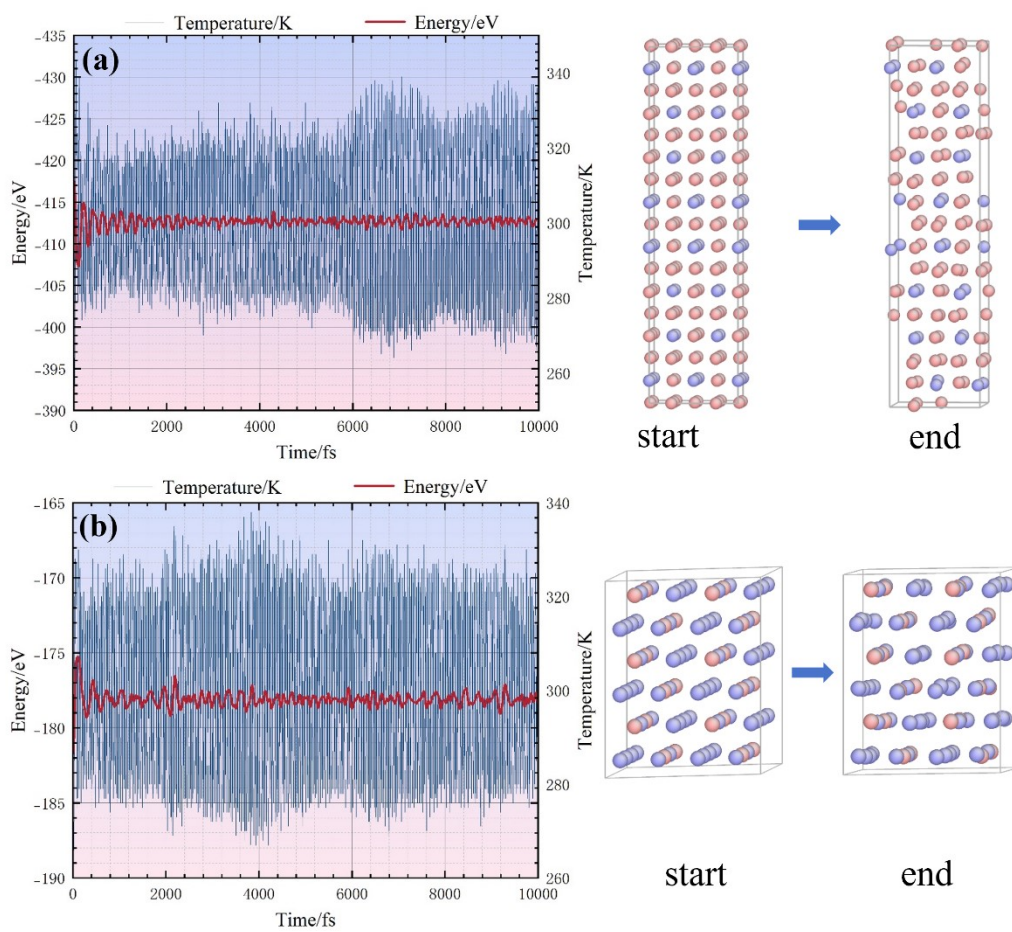

**Fig. S4**  $R^2$  variation curve and histograms of MAE, MSE performance of the model on the training and validation sets under five-fold-cross-validation. The model we used is the fifth fold.

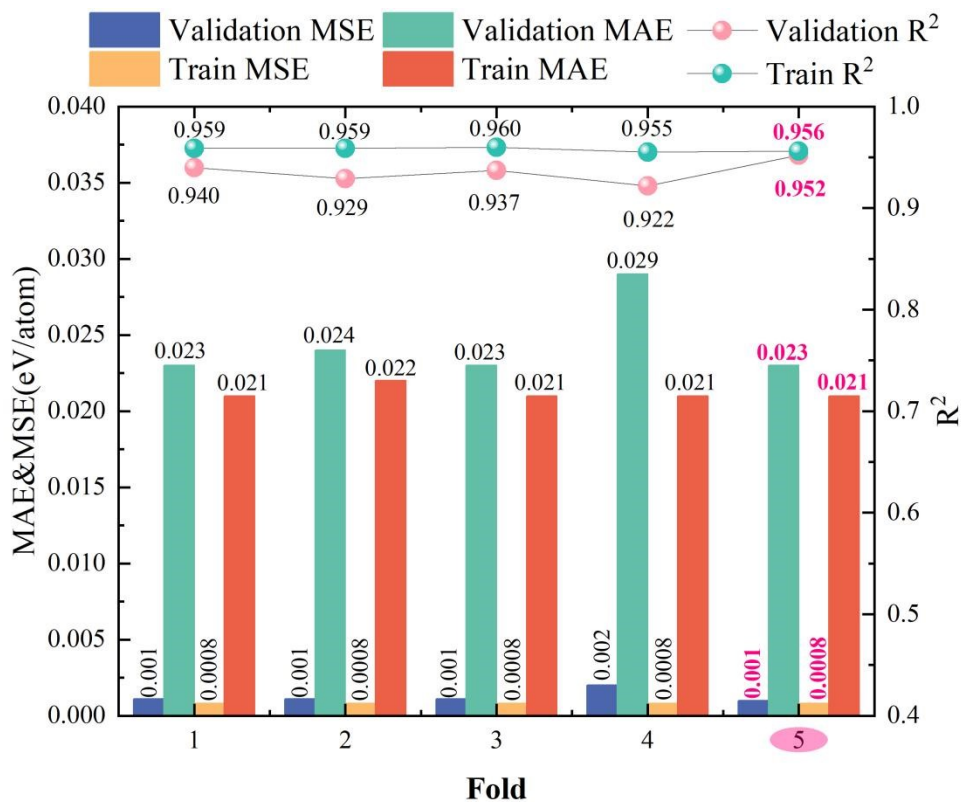



**Fig. S5** The structural changes for  $\text{CuZn}_5$  from the start (a) to the end (b) during performing AIMD simulation

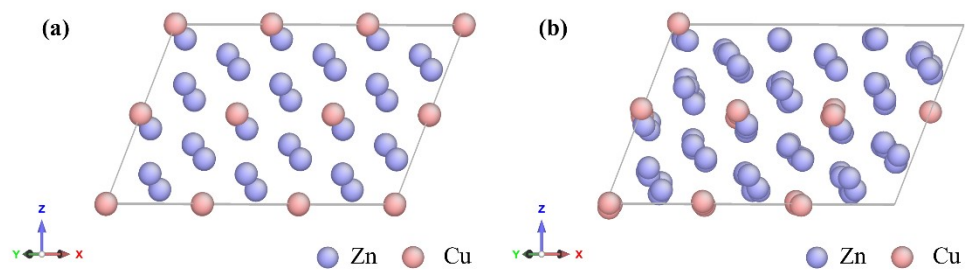

**Fig. S6** Pourbaix diagrams in a pure aqueous solution at 298 K, including (a) Cu: Zn = 3:1 (b) Cu: Zn = 1:1, (c) Cu: Zn = 5:8, (d) Cu: Zn=1:3, Pourbaix diagrams with chlorine in the solution at 298 K, including (e) Cu: Zn = 3:1 (f) Cu: Zn = 1:1, (g) Cu: Zn = 5:8, (h) Cu: Zn=1:3.

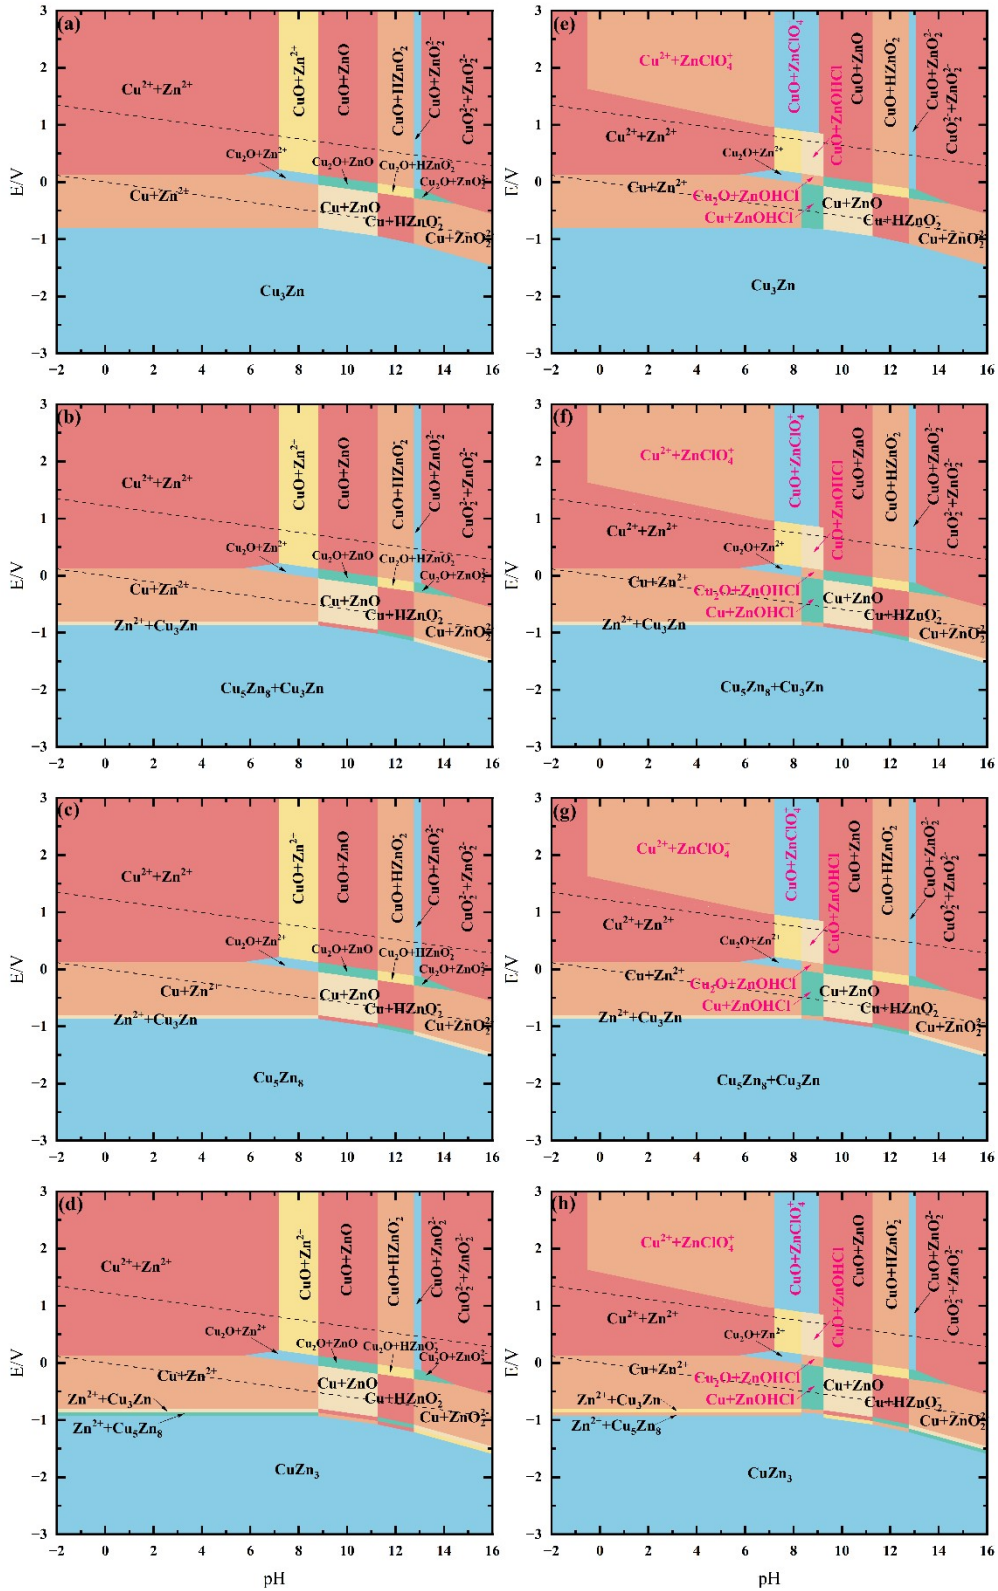

**Fig. S7** Pourbaix diagrams of Cu: Zn=1:10(Zn-rich alloys) in a pure aqueous solution at 298 K takes into account both cases (a) without  $\text{CuZn}_5$  and (b) with  $\text{CuZn}_5$ .

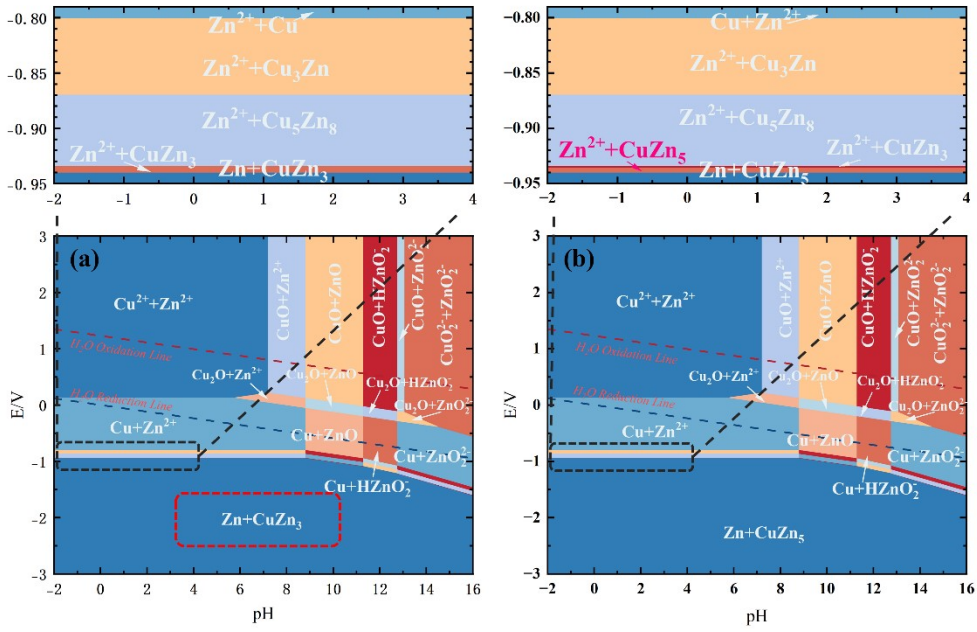

**Fig. S8** Pourbaix diagrams of chlorine.

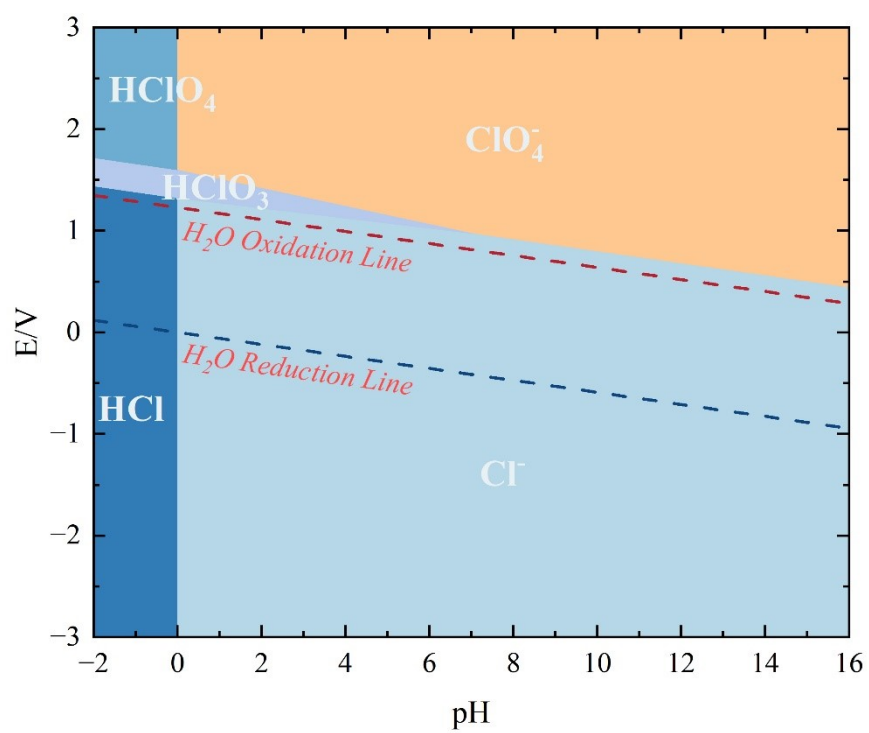

**Fig. S9** Valence charge density differences (VCDD) and electron charges (marked with one-way arrows) of  $\text{CuZn}_5$ (a) 2D (1 1 1) and pure Zn (b) 2D (0 0 1), respectively.

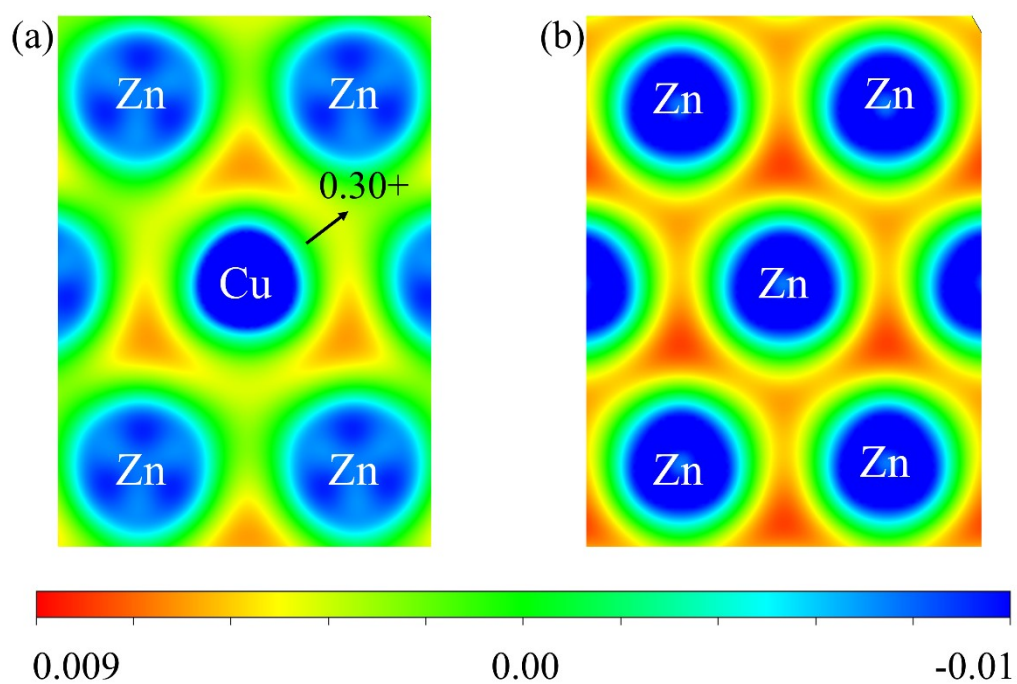

## References

- [1] A. Belsky, M. Hellenbrandt, V.L. Karen, P. Luksch, New developments in the Inorganic Crystal Structure Database (ICSD): accessibility in support of materials research and design, *Acta Crystallographica Section B: Structural Science*, 58 (2002) 364-369.
- [2] T. Chen, C. Guestrin, Xgboost: A scalable tree boosting system, in: *Proceedings of the 22nd acm sigkdd international conference on knowledge discovery and data mining*, 2016, pp. 785-794.
